# Supplementary material for: Fatigue and perceptual responses of heavier- and lighter-load isolated lumbar extension resistance exercise in males and females
Source: PeerJ. 2018 Mar 16;6:e4523. doi: 10.7717/peerj.4523 (PMC5858602; doi:10.7717/peerj.4523)
Supplement: Supplemental Information 1 — Raw data showing participant demographics, and pre- and post-strength for the control, heavier- and lighter load conditions as well as changes in strength. [file peerj-06-4523-s001.xlsx]

## Sheet: Sheet1
group	Age	Height (ins)	Height (cm)	Mass (lbs)	Mass (kgs)	pre-con	post-con	CHANGE CON	Relative Change	pre-hl	post-hl	CHANGE HL	Relative change	TUT-HL (Secs)	Discomfort (HL)	pre-ll	post-ll	CHANGE LL	relative Change	TUT-LL (Secs)	Discomfort (LL)
1	20	71	180.34	179	81.3636	379.44	427.04	47.6	12.5448	489.6	361.76	-127.84	-26.1111	56	7	495.04	331.84	-163.2	-32.967	89	9
1	22	68	172.72	134	60.9091	304.64	286.96	-17.68	-5.80357	183.6	141.44	-42.16	-22.963	84	6	281.52	167.28	-114.24	-40.5797	114	7
1	22	67	170.18	150	68.1818	348.16	364.48	16.32	4.6875	315.52	223.04	-92.48	-29.3103	41	6	357.68	233.92	-123.76	-34.6008	133	8
1	20	71	180.34	173	78.6364	374	384.88	10.88	2.90909	474.64	326.4	-148.24	-31.2321	52	7	493.68	398.48	-95.2	-19.2837	172	7
1	22	69	175.26	174	79.0909	413.44	403.92	-9.52	-2.30263	403.92	357.68	-46.24	-11.4478	38	7	403.92	292.4	-111.52	-27.6094	171	9
1	20	66	167.64	140	63.6364	257.04	262.48	5.44	2.1164	273.36	180.88	-92.48	-33.8308	56	6	276.08	174.08	-102	-36.9458	105	8
1	20	74	187.96	170	77.2727	308.72	286.96	-21.76	-7.04846	391.68	316.88	-74.8	-19.0972	64	6	408	248.88	-159.12	-39	152	8
1	39	71	180.34	196	89.0909	433.84	443.36	9.52	2.19436	406.64	382.16	-24.48	-6.02007	57	7	408	329.12	-78.88	-19.3333	114	8
1	29	69	175.26	148	67.2727	378.08	387.6	9.52	2.51799	387.6	342.72	-44.88	-11.5789	71	5	425.68	214.88	-210.8	-49.5208	150	8
2	21	64	162.56	151	68.6364	280.16	297.84	17.68	6.31068	243.44	220.32	-23.12	-9.49721	62	7	233.92	164.56	-69.36	-29.6512	220	8
2	20	68	172.72	130	59.0909	206.72	213.52	6.8	3.28947	167.28	172.72	5.44	3.25203	86	7	204	159.12	-44.88	-22	240	9
2	21	67	170.18	131	59.5455	232.56	263.84	31.28	13.4503	227.12	251.6	24.48	10.7784	70	6	238	195.84	-42.16	-17.7143	123	7
2	23	68	172.72	170	77.2727	261.12	265.2	4.08	1.5625	337.28	257.04	-80.24	-23.7903	55	6	223.04	156.4	-66.64	-29.878	233	9
2	21	63	160.02	108	49.0909	270.64	220.32	-50.32	-18.593	272	186.32	-85.68	-31.5	34	7	281.52	179.52	-102	-36.2319	116	8
2	22	69	175.26	181	82.2727	303.28	276.08	-27.2	-8.96861	296.48	244.8	-51.68	-17.4312	71	6	307.36	232.56	-74.8	-24.3363	200	8
2	21	70	177.8	150	68.1818	319.6	316.88	-2.72	-0.851064	293.76	252.96	-40.8	-13.8889	78	6	350.88	227.12	-123.76	-35.2713	142	9
2	21	68	172.72	132	60	345.44	345.44	0	0	341.36	331.84	-9.52	-2.78884	43	5	346.8	304.64	-42.16	-12.1569	118	8
